# Supplementary material for: High-yield and in situ fabrication of high-content nitrogen-doped graphene nanoribbons@Co/CoOOH as an integrated sulfur host towards Li–S batteries
Source: Royal Society of Chemistry journal article supplement (doi:10.1039/c9ta13414j), 2020-01-01
Supplement: c9ta13414j1.pdf [file c9ta13414j1.pdf]

## Electronic Supporting Information for

---

**High-yield and in-situ fabrication of high-content nitrogen-doped graphene nanoribbons@Co/CoOOH as an integrated sulfur host towards Li-S batteries**

*Ke Tan<sup>†</sup>, Yang Liu<sup>†</sup>, Zhaolin Tan, Jinyang Zhang, Linrui Hou and Changzhou Yuan\**

School of Materials Science & Engineering, University of Jinan, Jinan, 250022, P. R. China

E-mail: ayuancz@163.com; mse\_yuancz@ujn.edu.cn

<sup>†</sup> These authors contributed equally to this work.

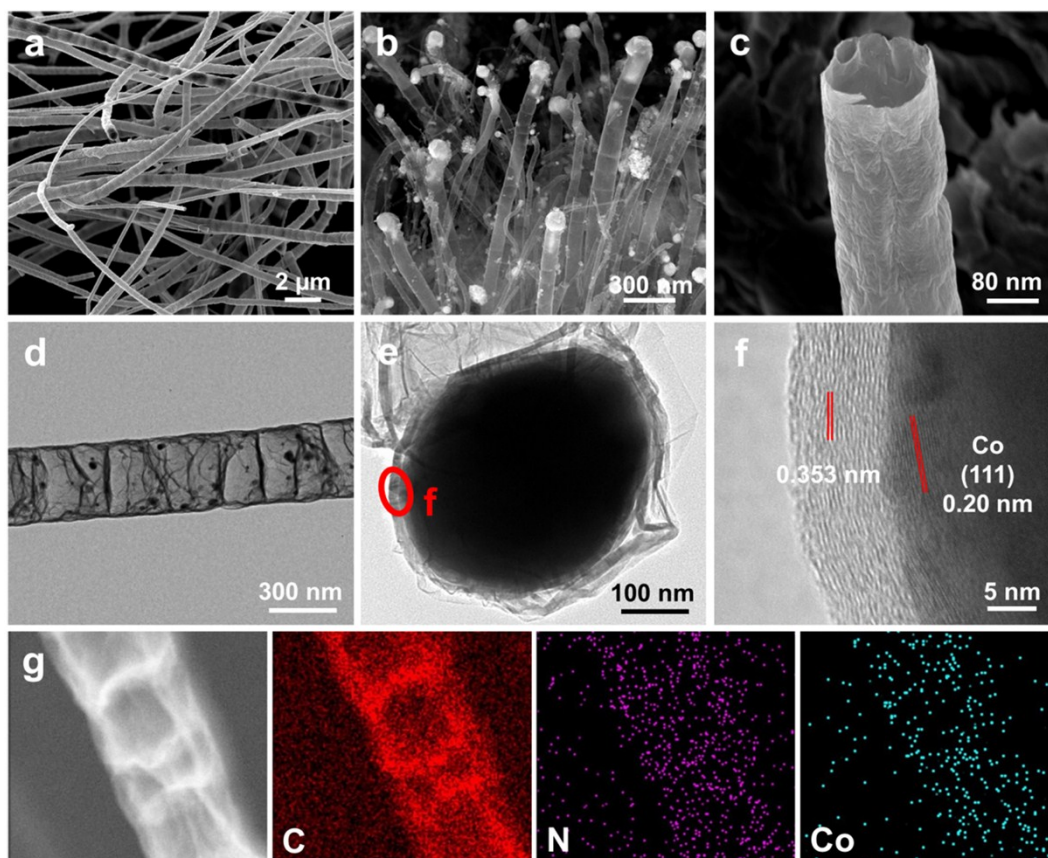

**Fig. S1** (a-c) FESEM, (d, e) TEM, (f) TEM images of the N-CNTs@Co and (g) EDX elemental mapping images of the N-CNTs@Co. It is clear that the N-CNTs@Co have bamboo-like structure, the cobalt nanoparticles at the top of N-CNTs and smaller cobalt nanoparticles distributed inside the N-CNTs@Co

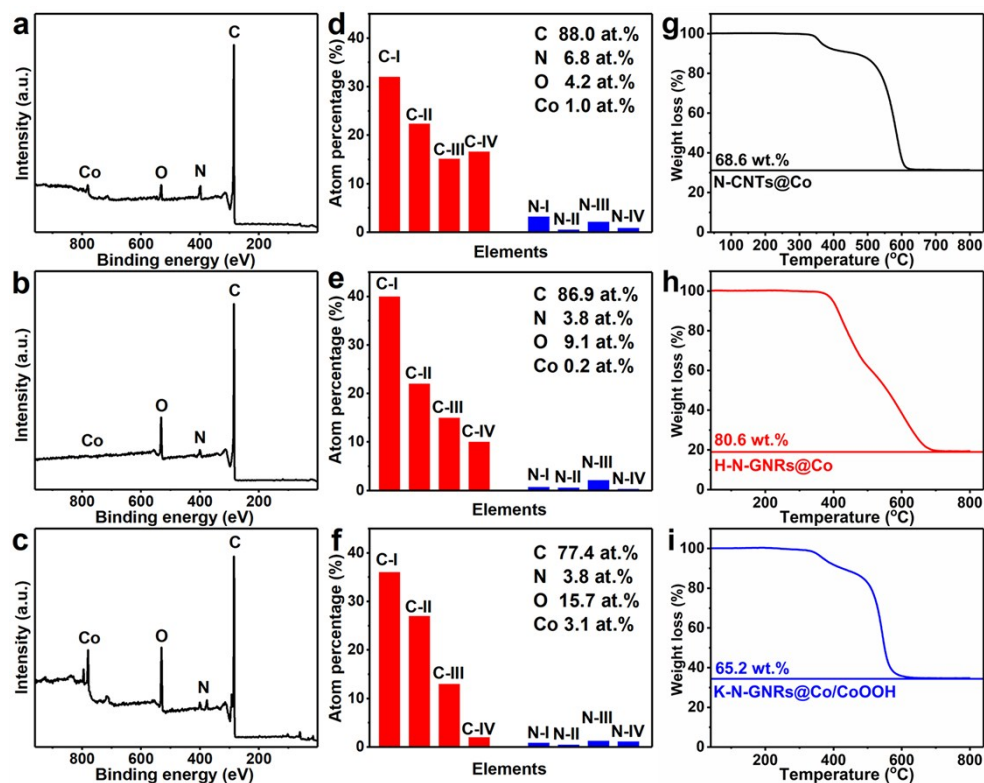

**Fig. S2** Typical XPS survey spectrum of the (a) N-CNTs@Co (above), (b) H-N-GNRs@Co (middle) and (c) K-N-GNRs@Co/CoOOH (bottom); Relative content profiles of different types of carbon and nitrogen atoms in the (d) N-CNTs@Co (above), (e) H-N-GNRs@Co (middle) and (f) K-N-GNRs@Co/CoOOH (bottom) and TGA curves of (g) N-CNTs@Co (above), (h) H-N-GNRs@Co (middle) and (i) K-N-GNRs@Co/CoOOH (bottom)

After conversion calculation from  $\text{Co}_3\text{O}_4$  and Co, the carbon content in the K-N-GNRs@Co/CoOOH and contrastive samples (N-CNTs@Co, H-N-GNRs@Co) have been calculated to be 77.0 wt.% (N-CNTs@Co), 85.8 wt.% (H-N-GNRs@Co) and 74.5 wt.% (K-N-GNRs@Co/CoOOH) *via* TG analysis (Fig. S2g-i).

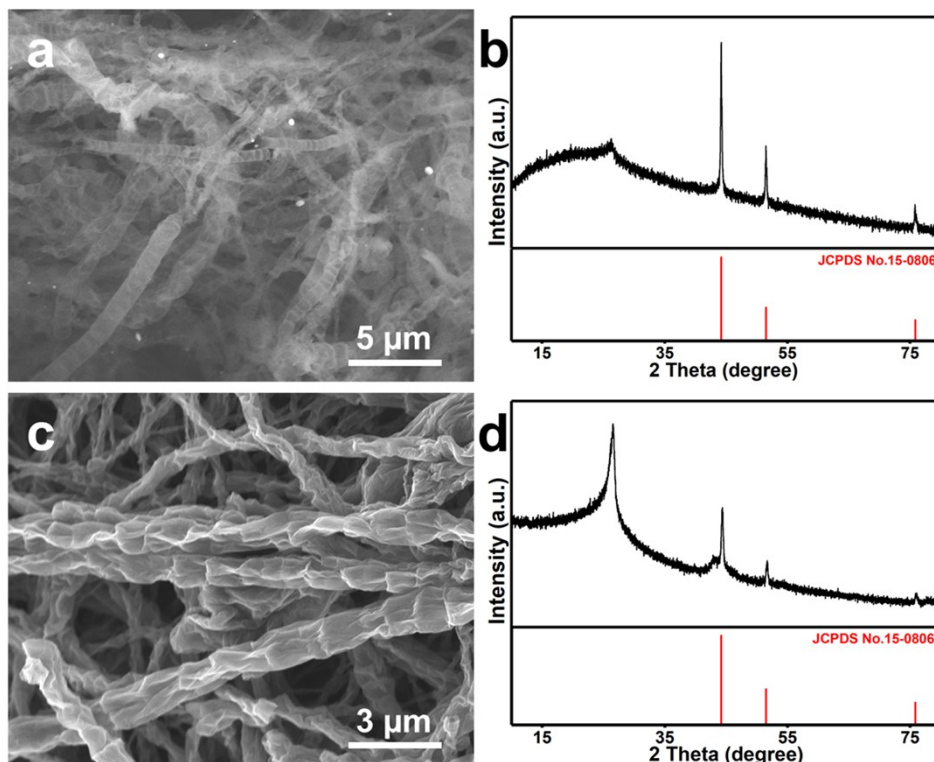

**Fig. S3** (a) SEM images and (b) XRD patterns of the N-CNTs@Co immersed in 6 M  $\text{HNO}_3$  for 6 h at 50 °C; (c) SEM images and (d) XRD patterns of the N-CNTs@Co immersed in 6 M  $\text{HNO}_3$  for 6 h at 70 °C

Obviously, the N-CNTs@Co cannot be unzipped effectively at a lower temperature of 50 °C (**Fig. S3a**). Besides, the typical diffraction peaks for metal Co (JCPDS No. 15-08-06), the weak signal at 26.5 ° for the (002) plane of the graphitic carbon can be observed in **Fig. S3b**, which indicating the amorphous carbon cannot be etched from the N-CNTs@Co at such condition. While with the temperature increasing to 70 °C, the N-CNTs@Co is unzipped thoroughly (**Fig. S3c**), and graphitization degree is improved significantly as the (002) peak turns out to be even strong (**Fig. S3d**), suggesting the high-content amorphous carbon have been etched well by 6 M  $\text{HNO}_3$  at 70 °C for 6 h. Moreover, the intensity of the Co signal becomes weaker, revealing more metallic Co has been removed from the N-CNTs@Co with the unzipping temperature increasing.

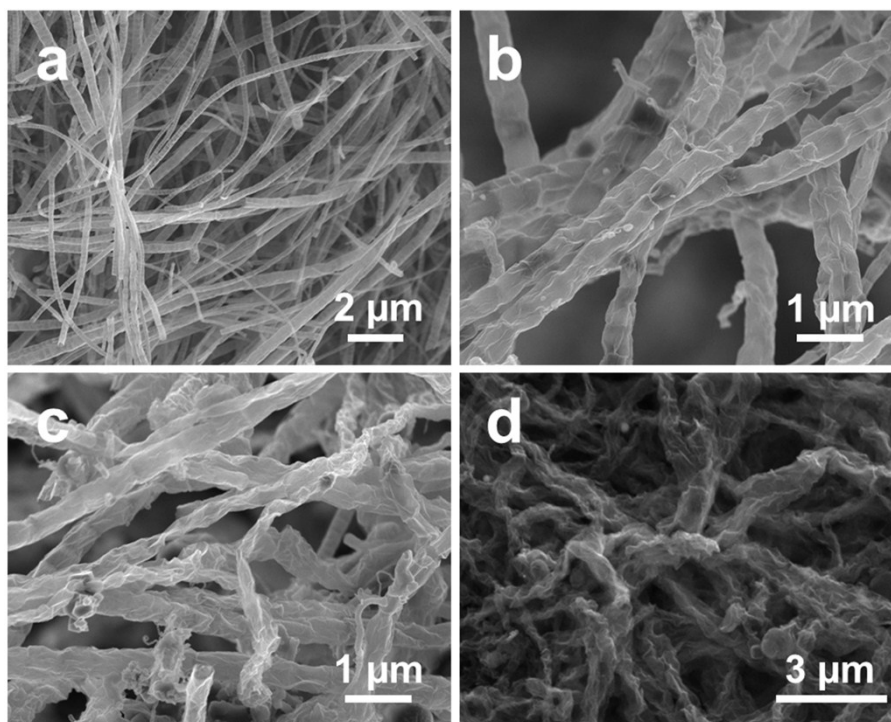

**Fig. S4** SEM images of the N-CNTs@Co immersed in  $\text{HNO}_3$  solutions with different concentrations: (a) 2 M, (b) 4 M, (c) 8 M and (d) 16 M

Interestingly, the concentration of the aqueous  $\text{HNO}_3$  hugely influences the final structure of the products, and the soaking temperatures are all kept at 60 °C for 6h. As for the case of the  $\text{HNO}_3$  unzipping process, the N-CNTs@Co cannot be well unzipped with the 2 M (**Fig. S4a**) and 4 M (**Fig. S4b**)  $\text{HNO}_3$ , while the high-concentration 8 M (**Fig. S4c**) and 16 M (**Fig. S4d**)  $\text{HNO}_3$  obviously destroy its unique 1D morphology. Thus, the approximate soaking concentration is chosen as 6 M.

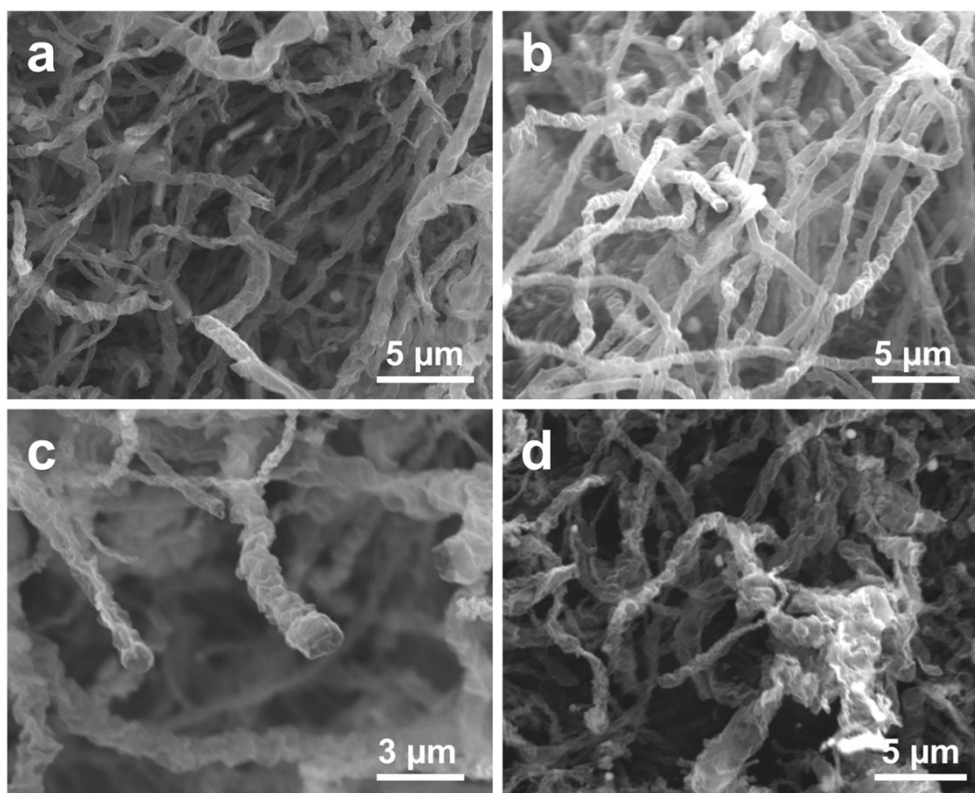

**Fig. S5** SEM images of the N-CNTs@Co immersed in 6 M HNO<sub>3</sub> solution at 60 °C for (a) 2 h and (b) 4 h

When the soaking time is lower than 6h, it is obviously that N-CNTs@Co could not be well unzipped (2 h, **Fig. S5a**; 4 h, **Fig. S5b**). And if the soaking time was prolonged to 8 h (**Fig. S5c**), some GNRs can be observed. But the nanoribbons structure would be seriously destroyed as the soaking time was further extended to 12 h (**Fig. S5d**).

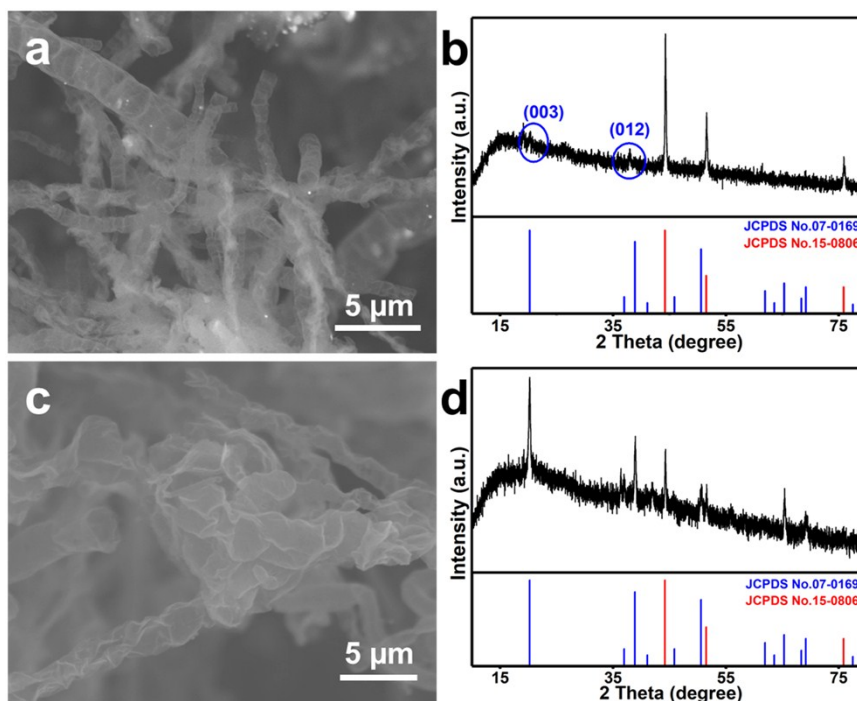

**Fig. S6** (a) SEM images and (b) XRD pattern of the N-CNTs@Co immersed in 10 M KOH solutions for 6 h at 80 °C; (c) SEM images and (d) XRD pattern of the N-CNTs@Co immersed in 10 M KOH solution for 6 h at 100 °C

Similarly, the N-CNTs@Co could not be well unzipped at a lower temperature of 80 °C (**Fig. S6a**), and just a little CoOOH (JCPDS No. 07-0169) appears (**Fig. S6b**), except the metal Co. In contrast, some large CoOOH nanosheets emerge after being unzipped at 100 °C for 6 h besides the 1D N-GNRs (**Fig. S6c, S6d**).



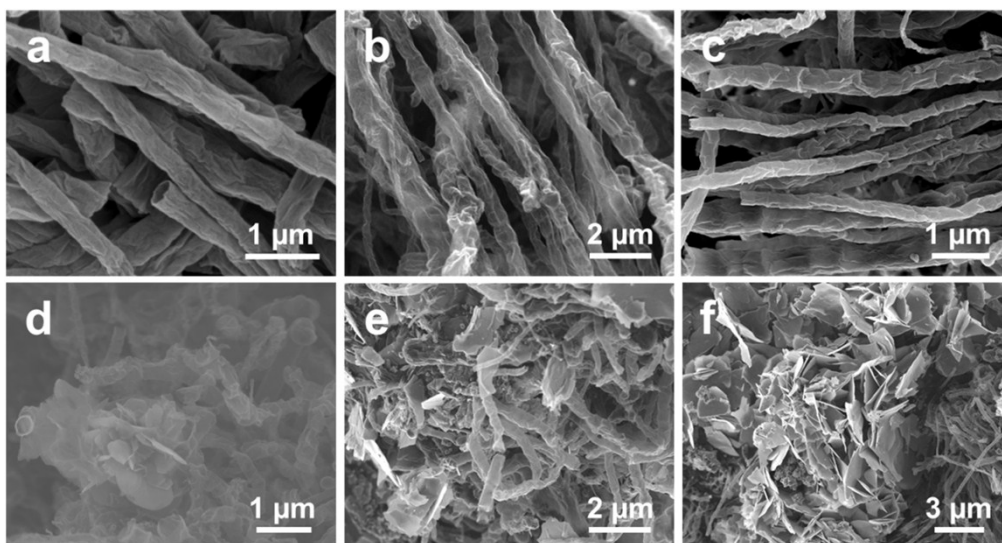

**Fig. S7** SEM images of the N-CNTs@Co immersed in (a) 5 M, (b) 8 M, (c) 9 M, (d) 11 M, (e) 12 M and (f) 15 M KOH solutions at 90 °C for 6 h

As regards the KOH unzipping cases, we explored the influence of KOH solution concentrations (**Fig. S7**). Evidently, the low-concentration KOH solution (5 M) cannot result in the successful formation of the nanoribbon structure, and most of them are still NTs (**Fig. S7a**). As the concentration is increased to 8 M (**Fig. S7b**) and 9 M (**Fig. S7c**), more and more nanoribbon-like structure could be found. But with the concentration of KOH solution is higher than 10 M, partial CoOOH nanosheets appear in the sample after treated by 11 M KOH solution (**Fig. S7d**), and more nanosheets of even larger size are observed when the concentration increased to 12 M (**Fig. S7e**). More interestingly, when the KOH concentration is up to 15 M, almost whole nanosheets can be observed (**Fig. S7f**).



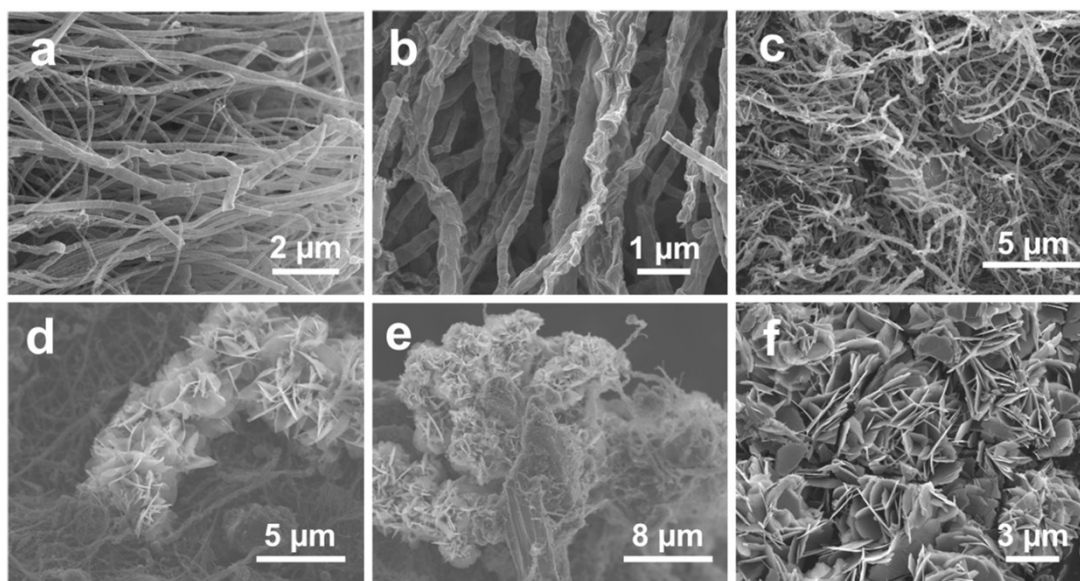

**Fig. S8** SEM images of the N-CNTs@Co immersed in 10 M KOH solutions at 90 °C for different times: (a) 2 h, (b) 4 h, (c) 8 h, (d) 12 h, (e) 16 h and (f) 24 h

For the influence of the unzipping time, the N-CNTs@Co is soaked in 10 M KOH solutions for 2 h, 4 h, 8 h, 12 h, 16 h and 24 h, respectively, at 90 °C. As for the case of 2 h (**Fig. S8a**), a little N-CNTs@Co can be unzipped. And more GNRs are observed as the time prolongs to 4 h (**Fig. S8b**). But when soaked for 8 h, extra CoOOH nanosheets are obvious (**Fig. S8c**), and these nanosheets grow even bigger as the time increases to 12 h (**Fig. S8d**). For a longer soaked time, just a little GNRs are visualize after 16 h (**Fig. S8e**) and with further unzipping for 24 h (**Fig. S8f**), nearly all the CoOOH nanosheets emerge, and no any 1D structures can be observed.

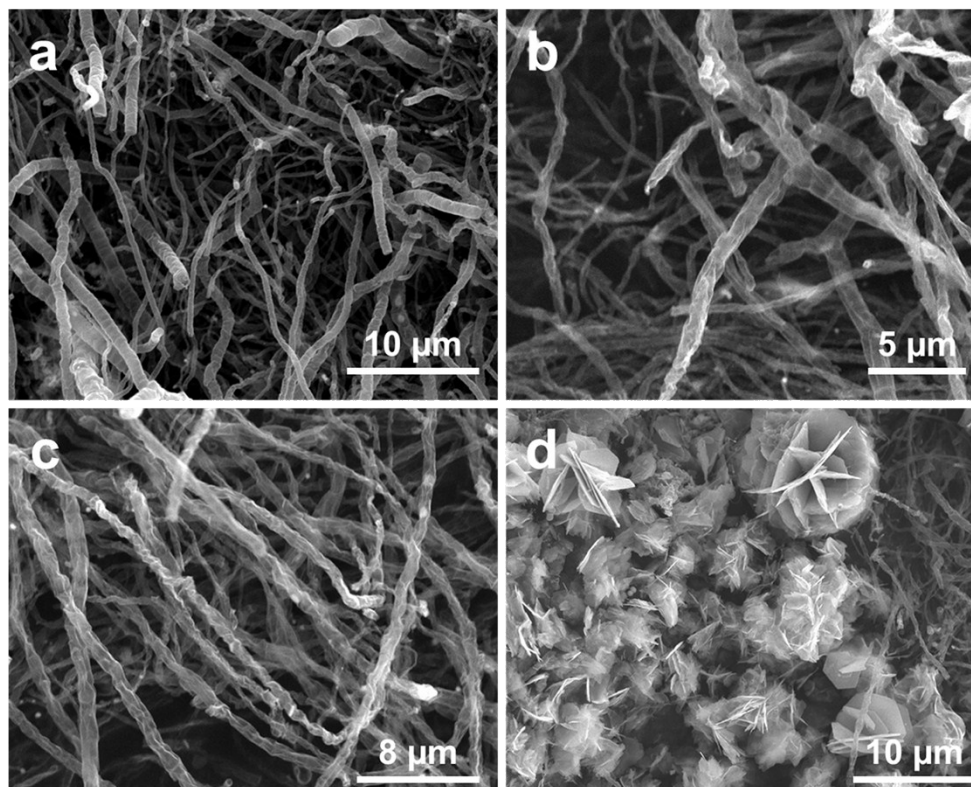

**Fig. S9** SEM images of N-CNTs@Co immersed in 10 M KOH solutions at room temperature for (a) 6 h, (b) 12 h, (c) 18 h and (d) 24 h

For the unzipping of N-CNTs@Co by KOH solutions, we found that N-CNTs@Co also could be partially unzipped at room temperature (**Fig. S9**). When being soaked for 6 h, the N-CNTs@Co is not obviously been unzipped (**Fig. S9a**), and be partly unzipped as the time was prolonged to 12 h (**Fig. S9b**) and 18h (**Fig. S9c**). But if further extended the unzipping time, distinct huge CoOOH nanosheets would appear (**Fig. S9d**).

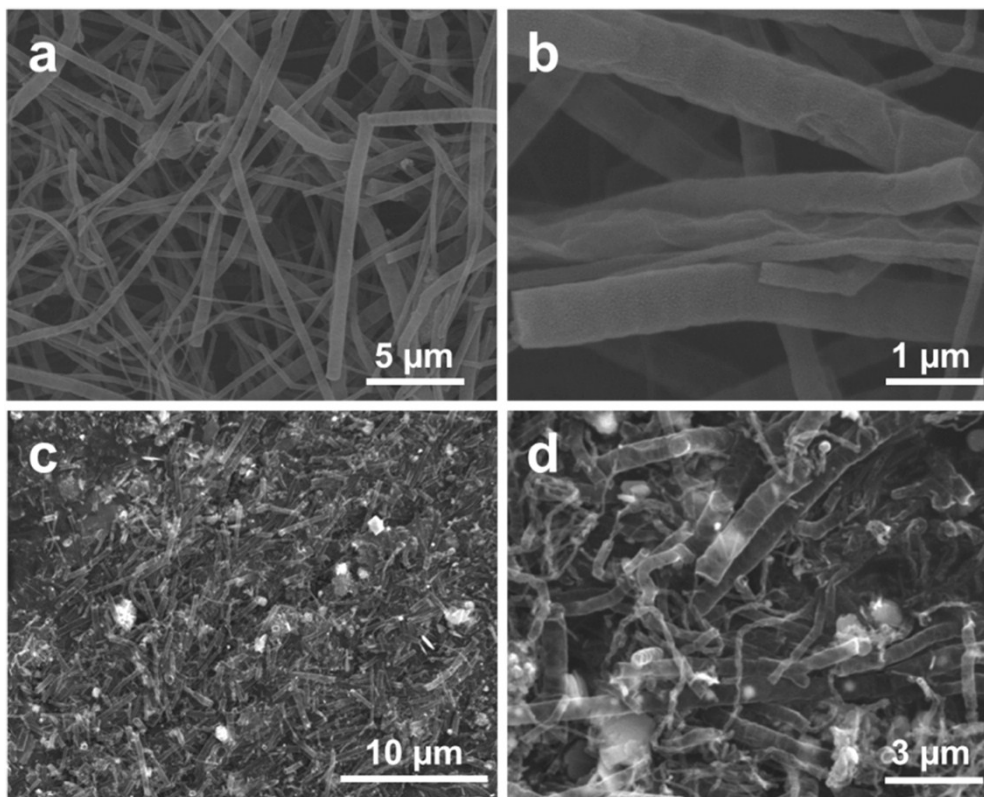

**Fig. S10** SEM images of (a, b) the fresh N-CNTs@Co-1000 and (c, d) after immersed in 10 M KOH solution at 90 °C for 6 h

In addition, when the degree of graphitization of such carbon nanotubes is higher, the KOH solution cannot be unzipped. **Fig. S10** shows SEM images of the N-CNTs@Co-1000 (**Fig. S10a, b**) and those after etched by KOH solutions (**Fig. S10c, d**). It can be seen that when the degree of graphitization is higher, the KOH solution just can cut the N-CNTs into small segments without unzipping.

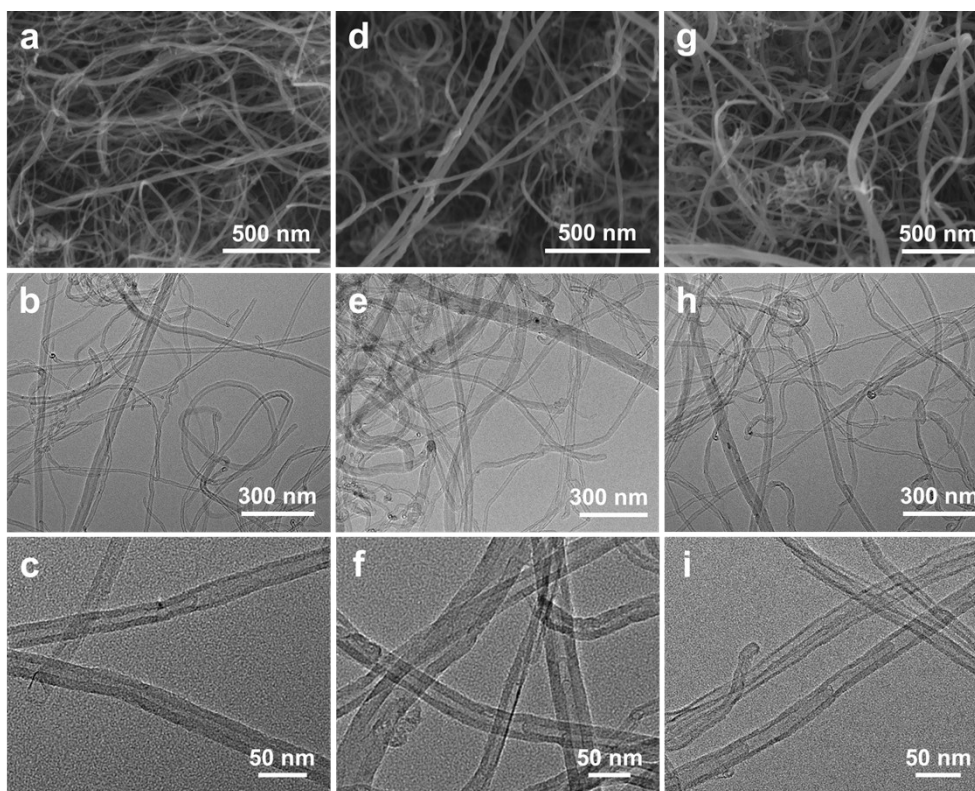

**Fig. S11** (a) FESEM image and (b, c) TEM images of commercial CNTs, (d) FESEM image and (e, f) TEM images of commercial CNTs immersed in 6M HNO<sub>3</sub> solutions for 6h at 60 °C, (g) FESEM image and (h, i) TEM images of commercial CNTs immersed in 10 M KOH solutions for 6 h at 90 °C

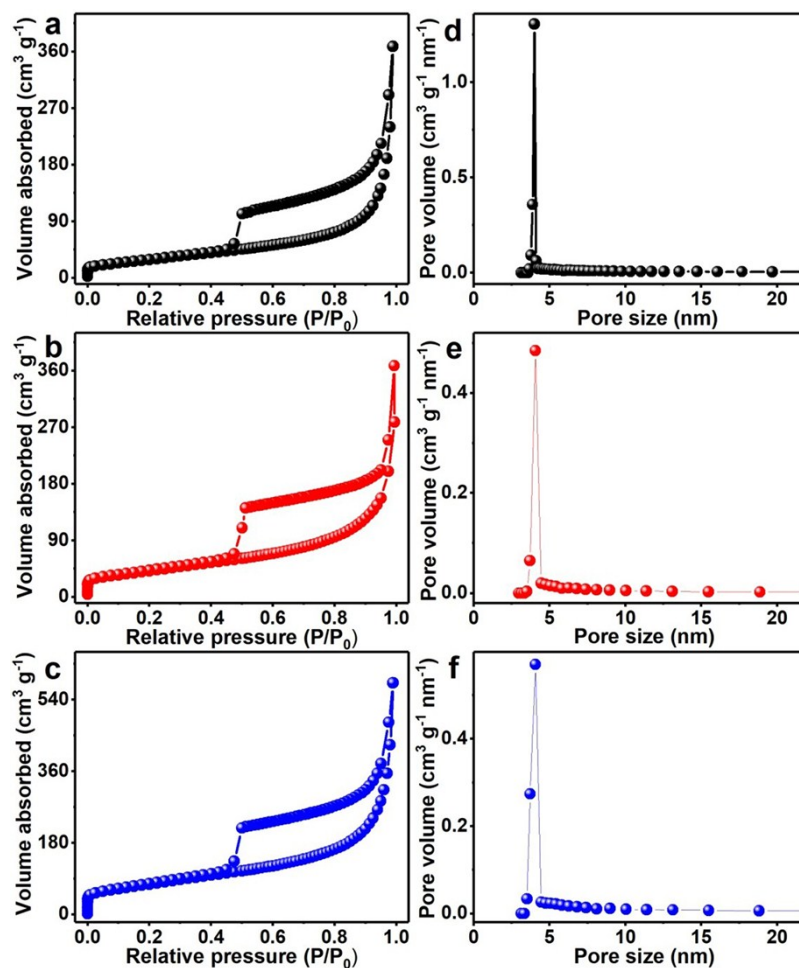

**Fig. S12** (a – c) N<sub>2</sub> adsorption-desorption isotherms and (d – f) pore size distribution plots of (a, d) N-CNTs@Co (the upper), (b, e) H-N-GNRs@Co (the middle) and (c, f) K-N-GNRs@Co/CoOOH (the lower)

**Table S1** Total pore volume, average pore size and BET SSA of the N-CNTs@Co, H-N-GNRs@Co and K-N-GNRs@Co/CoOOH

| Materials         | Pore volume<br>(cm <sup>3</sup> g <sup>-1</sup> ) | Average pore<br>size (nm) | BET SSA<br>(m <sup>2</sup> g <sup>-1</sup> ) |
|-------------------|---------------------------------------------------|---------------------------|----------------------------------------------|
| N-CNTs@Co         | 0.37                                              | 2.02                      | 112.6                                        |
| H-N-GNRs@Co       | 0.57                                              | 9.71                      | 150.6                                        |
| K-N-GNRs@Co/CoOOH | 0.90                                              | 13.19                     | 273.3                                        |

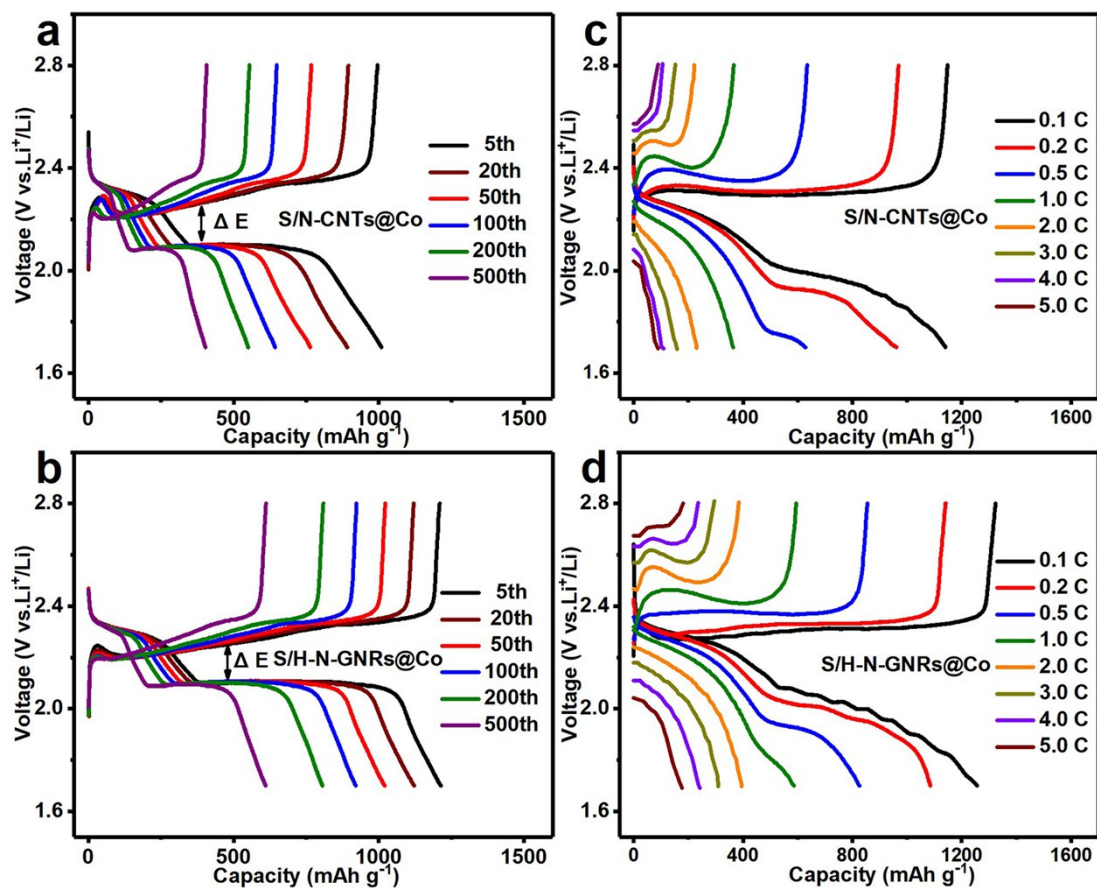

**Fig. S13** The galvanostatic charge and discharge voltage profiles of (a) S/H-N-GNRs@Co, (b) S/N-CNTs@Co electrodes for selected cycles; The galvanostatic charge and discharge voltage profiles at different current densities from 0.1 C to 5 C of (c) S/H-N-GNRs@Co and (d) S/N-CNTs@Co



**Table S2** Electrochemical collection of the S/N-CNTs@Co, S/H-N-GNRs@Co and S/K-N-GNRs@Co/CoOOH electrodes

| Cathodes            | S content (wt.%) | Initial capacity (mAh g <sup>-1</sup> ) | Capacity after 500 cycles (mAh g <sup>-1</sup> ) | Decay per cycle | Rate capability (mAh g <sup>-1</sup> at 5 C) |
|---------------------|------------------|-----------------------------------------|--------------------------------------------------|-----------------|----------------------------------------------|
| S/N-CNTs @Co        | 63.5             | 1009.3                                  | 400.7                                            | 0.12%           | 86                                           |
| S/H-N-GNRs@Co       | 68.2             | 1257.7                                  | 608.0                                            | 0.10%           | 182                                          |
| S/K-N-GNRs@Co/CoOOH | 73.7             | 1195.6                                  | 804.9                                            | 0.06%           | 533                                          |

**Table S3** Electrochemical performance of the S/K-N-GNRs@Co/CoOOH with different areal S loadings at 0.5 C

| Areal S loading         | Initial capacity           | After 1000 cycles         | Decay per cycle |
|-------------------------|----------------------------|---------------------------|-----------------|
| 1.1 mg cm <sup>-2</sup> | 1328.7 mAh g <sup>-1</sup> | 558.9 mAh g <sup>-1</sup> | 0.06%           |
| 3.9 mg cm <sup>-2</sup> | 1139.3 mAh g <sup>-1</sup> | 516.7 mAh g <sup>-1</sup> | 0.05%           |

**Table S4** Comparison of battery properties of S/K-N-GNRs@Co/CoOOH and other S-based cathodes (1C = 1650 mA g<sup>-1</sup>)

| Electrodes                 | Sulfur content (wt.%) | Cycling stability                                    | Rate capability                  | Reference |
|----------------------------|-----------------------|------------------------------------------------------|----------------------------------|-----------|
| S/K-N-GNRs@Co/CoOOH        | 73.7                  | 804.9 mAh g <sup>-1</sup> after 500 cycles at 0.2 C  | 533 mAh g <sup>-1</sup> at 5.0 C | This work |
| S/CoOOH                    | 68.2                  | 788.4 mAh g <sup>-1</sup> after 100 cycles at 0.2 C  | 535 mAh g <sup>-1</sup> at 2.0 C | [1]       |
| S/GN-CNT                   | 76.4                  | 639.1mAh g <sup>-1</sup> after 200 cycles at 0.1 C   | 408 mAh g <sup>-1</sup> at 2.0 C | [2]       |
| S/UZ.CNTs                  | 51.0                  | 707.2 mAh g <sup>-1</sup> after 60 cycles at 0.2 C   | 530 mAh g <sup>-1</sup> at 2.0 C | [3]       |
| S/NBCGN                    | 65.0                  | 740.0 mAh g <sup>-1</sup> after 300 cycles at 0.2 C  | 400 mAh g <sup>-1</sup> at 4.0 C | [4]       |
| S/MWNT-OH25                | 66.0                  | 720.0 mAh g <sup>-1</sup> after 100 cycles at 0.1 C  | 400 mAh g <sup>-1</sup> at 2.0 C | [5]       |
| S/ACT@Fe/Fe <sub>3</sub> C | 50.0                  | 466.0 mAh g <sup>-1</sup> after 600 cycles at 0.4 C  | 440 mAh g <sup>-1</sup> at 0.4 C | [6]       |
| C-Co-S                     | 66.6                  | 643.0 mAh g <sup>-1</sup> after 300 cycles at 0.18 C | 479 mAh g <sup>-1</sup> at 5.0 C | [7]       |
| S/NP-TiO@C                 | 73.0                  | 680.0 mAh g <sup>-1</sup> after 400 cycles at 0.2 C  | 620 mAh g <sup>-1</sup> at 2.0 C | [8]       |

Note: S/CoOOH: nano-sulfur/CoOOH nanosheets; S/GN-CNT: nano-sulfur/CNTs in-situ formed on graphene nanosheets; S/UZ.CNTs: sulfur/unzipped CNTs; S/NBCGN: sulfur/N, B co-doped curved graphene nanosheets; S/MWNT-OH25: sulfur/hydroxylated MWCNTs; S/ACT@Fe/Fe<sub>3</sub>C: sulfur/activated cotton textile@Fe/Fe<sub>3</sub>C nanoparticles; C-Co-S: sulfur/Co-doped porous carbon; S/NP-TiO@C: sulfur/titanium monoxide@carbon.

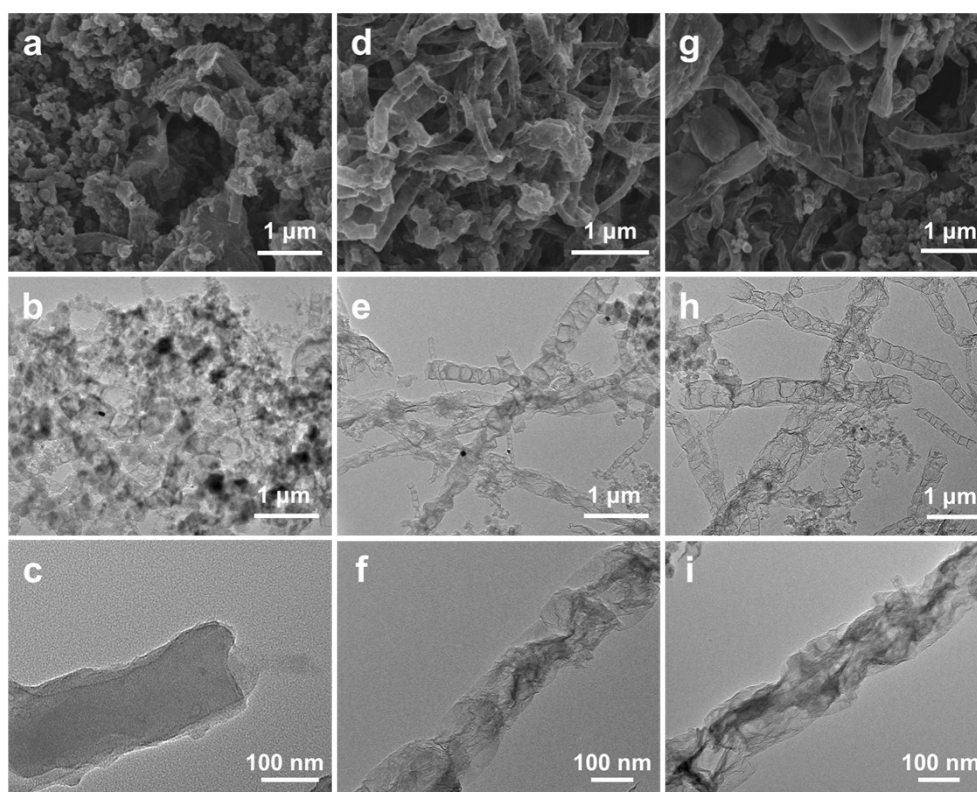

**Fig. S14** (a) FESEM image and (b, c) TEM images of N-CNTs, (d) FESEM image and (e, f) TEM images of H-N-GNRs@Co, (g) FESEM image and (h, i) TEM images of K-N-GNRs@Co/CoOOH after cycling

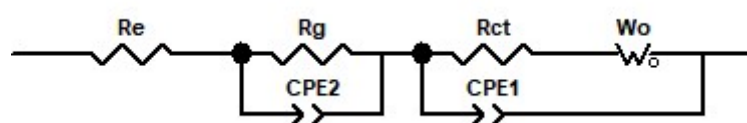

**Fig. S15** The equivalent circuit mode used to fit the EIS spectra of the S/N-CNTs@Co, S/H-N-GNRs@Co and S/K-N-GNRs@Co/CoOOH

**Table S5** Fitted data of EIS spectra of the fresh S/N-CNTs@Co, S/H-N-GNRs@Co and S/K-N-GNRs@Co/CoOOH cathodes

| Cathodes            | $R_e/\text{ohm}$ | $R_{ct}/\text{ohm}$ | $R_g/\text{ohm}$ | $W_o/\text{ohm}$ |
|---------------------|------------------|---------------------|------------------|------------------|
| S/N-CNTs@Co         | 5.9              | 158.6               | 116.2            | 533.8            |
| S/H-N-GNRs@Co       | 5.5              | 26.6                | 32.1             | 170.2            |
| S/K-N-GNRs@Co/CoOOH | 3.3              | 22.5                | 10.7             | 110.1            |

## References

- [1] Z. Wang, L. Wang, S. Liu, G. Li and X. Gao, *Adv. Funct. Mater.*, **2019**, 29, 1901051.
- [2] Z. Zhang, L. Kong, S. Liu, G. Li and X. Gao, *Adv. Energy Mater.*, **2017**, 7, 1602543.
- [3] Y. Jeong, K. Lee, T. Kim, J. Kim, J. Park, Y. Cho, S. Yang and C. Park, *J. Mater. Chem. A*, **2016**, 4, 819.
- [4] L. Chen, J. Feng, H. Zhou, C. Fu, G. Wang, L. Yang, C. Xu, Z. Chen, W. Yang and Y. Kuang, *J. Mater. Chem. A*, **2017**, 5, 7403.
- [5] J. Kim, K. Fu, J. Choi, S. Sun, J. Kim, L. Hu and U. Paik, *Chem. Commun.*, **2015**, 51, 13682.
- [6] Z. Gao, Y. Schwab, Y. Zhang, N. Song and X. Li, *Adv. Funct. Mater.*, **2018**, 28, 1800563.
- [7] Z. Li, C. Li, X. Ge, J. Ma, Z. Zhang, Q. Li, C. Wang and L. Yin, *Nano Energy*, **2016**, 23, 15.
- [8] Z. Li, B. Guan, J. Zhang and X. Lou, *Joule*, **2017**, 1, 576.
